# Supplementary material for: Novel triethylamine catalyzed S → O acetyl migration reaction to generate candidate thiols for construction of topological and functional sulfur-containing polymers
Source: Royal Society of Chemistry journal article supplement (doi:10.1039/c4ra09842k), 2014-12-15
Supplement: c4ra09842k1.pdf [file c4ra09842k1.pdf]

## Supporting Information

# Triethylamine catalyzed S→O Acyl Migration Reaction for Generating Thiols and Its Combination with Thiol-click Chemistry

Gang Wang,<sup>a,c,†</sup> Li Peng,<sup>b,†</sup> Yaochen Zheng,<sup>b</sup> Yanqin Gao,<sup>b</sup> Xuedong Wu,<sup>a</sup> Tianhui Ren,<sup>c</sup> Chao Gao<sup>b,\*</sup> and Jin Han<sup>a,\*</sup>

<sup>a</sup> Key Laboratory of Marine New Materials and Related Technology, Zhejiang Key Laboratory of Marine Materials and Protection Technology, Ningbo Institute of Material Technology & Engineering, Chinese Academy of Sciences, Ningbo, 315201, P. R. China.

<sup>b</sup> MOE Key Laboratory of Macromolecular Synthesis and Functionalization, Department of Polymer Science and Engineering, Zhejiang University, Hangzhou, 310027, P. R. China.

<sup>c</sup> School of Chemistry and Chemical Engineering, Shanghai Jiao Tong University, Shanghai, 200240, P. R. China.

## Experimental

### Chemicals:

Allyl glycidyl ether, 1,6-diisocyanatohexane, *n*-butyl acrylate, propylene oxide, methyl acrylate, propargyl alcohol, thiolacetic acid, *N*-isopropylacrylamide, glycidyl methacrylate, 2,2'-azobisisobutyronitrile, 4-Dimethylaminopyridine (DMAP), 1,8-Diazabicyclo[5.4.0]undec-7-ene (DBU) and 2,2-dimethoxy-2-phenylacetophenone were purchased from Aladdin Chemical Co., China. Propargyl glycidyl ether was obtained from DaTang Pharmacy Co., China. Allyl isocyanate and allyl isothiocyanate were acquired from Sigma Aldrich. 1-Octyne and triglycidyl isocyanurate were purchased from TCI Shanghai. Octavinyl-T8-silsesquioxane was purchased from Hybrid Plastics, Co.. Epoxy terminated polydimethylsiloxane (PDMS) ( $M_n = 2300$ ) was supplied by Evonik Co.. Triethylamine (TEA), CH<sub>2</sub>Cl<sub>2</sub>, CHCl<sub>3</sub>, tetrahydrofuran, methanol, toluene, and diethyl ether were purchased from Sinopharm Chemical Reagent Co., Ltd. Tetrahydrofuran and toluene were dried over CaH<sub>2</sub> and distilled. All other reagents were used without further purification.

### Measurements:

<sup>1</sup>H and <sup>13</sup>C nuclear magnetic resonance spectroscopy (NMR) spectroscopy was carried out on a Varian Mercury plus 400 NMR spectrometer at 20 °C. The samples were dissolved with CDCl<sub>3</sub> and the solutions were measured with tetramethylsilane as an internal reference. Fourier transform infrared (FTIR) spectra were recorded on a PE Paragon 1000 spectrometer (film or KBr disk). Gel permeation chromatography (GPC) was recorded on a Perkin Elmer HP 1100, using THF as the eluent at a flow rate of 1 mL min<sup>-1</sup>, RI-WAT 150 CVT+ as the detector and linear polystyrene for calibration at 40 °C for characterization of apparent molecular weights. Mass spectrum was recorded by Bruker Esquire 3000plus ion trap mass spectrometer (Bruker-Franzen Analytik GmbH, Bremen, Germany). Nitrogen was used as nebulizing gas at a pressure of 10 psi and drying gas at a flow rate of 5 L min<sup>-1</sup>. The drying gas temperature was set at 250 °C and the capillary voltage was set at 4000 V. Solutions were infused to the mass spectrometer with a syringe pump at a flow rate of 6 μL min<sup>-1</sup>.

### General procedure for thiol-epoxy reactions between epoxy compounds **1** and thioacetic acid to generate **2**

A CH<sub>2</sub>Cl<sub>2</sub> (12 mL) solution of thioacetic acid (1.84 g, 24.0 mmol) was mixed with a CH<sub>2</sub>Cl<sub>2</sub> solution of epoxy compounds (20.0 mmol). Then, TEA (100.0 mg, 1.0 mmol) was injected into the mixture through a microsyringe. After vigorous stirring for 10 h at room temperature, the mixture was diluted with another 40 mL of CH<sub>2</sub>Cl<sub>2</sub>, washed with 1 M HCl aqueous solution, saturated NaHCO<sub>3</sub> aqueous solution, and deionized water, successively, dried by anhydrous MgSO<sub>4</sub>. All the volatiles were evaporated to afford **2** in nearly quantitative yield.

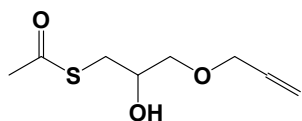

**2a:** <sup>1</sup>H NMR (400 MHz, CDCl<sub>3</sub>): δ 2.34 (s, 3H), 2.98-3.11 (m, 2H), 3.90 (m, 1H), 2.65 (m, 1H), 3.39-3.51 (m, 2H), 4.00 (m, 2H), 5.89 (m, 1H), 5.20 (m, 1H). (Figure S1)

<sup>13</sup>C NMR (400 MHz, CDCl<sub>3</sub>): δ 30.60, 196.43, 32.79, 69.89, 72.81, 72.42, 134.60, 117.52. (Figure S2)

FTIR: 3456 cm<sup>-1</sup> (-OH). (Figure S3)

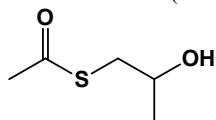

**2b:** <sup>1</sup>H NMR (400 MHz, CDCl<sub>3</sub>): δ 2.34 (s, 3H), 2.87-3.13 (m, 2H), 3.92 (m, 1H), 2.60 (s, 1H), 1.99-2.28 (m, 1H), 1.26 (d, 3H). (Figure S4)

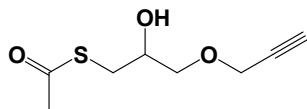

**2c:** <sup>1</sup>H NMR (400 MHz, CDCl<sub>3</sub>): δ 2.57 (s, 3H), 2.97-3.16 (m, 2H), 3.94 (m, H), 2.59 (m, H), 3.48-3.63 (m, 2H), 4.19 (s, 2H), 2.46 (s, H). (Figure S5)

<sup>13</sup>C NMR (400 MHz, CDCl<sub>3</sub>): δ 30.60, 196.56, 32.49, 69.66, 72.28, 58.66, 75.32, 79.49. (Figure S6)

FTIR: 3456 cm<sup>-1</sup> (-OH). (Figure S7)

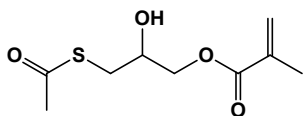

**2d:** <sup>1</sup>H NMR (400 MHz, CDCl<sub>3</sub>): δ 2.34 (s, 3H), 2.97-3.12 (m, 2H), 3.98 (m, H), 2.90 (m, H), 4.15 (m, 2H), 5.57, 6.12 (s, 2H), 1.91 (s, 3H). (Figure S8)

<sup>13</sup>C NMR (400 MHz, CDCl<sub>3</sub>): δ 30.51, 196.08, 32.46, 66.91, 69.05, 167.16, 135.72, 126.20, 18.20. (Figure S9)

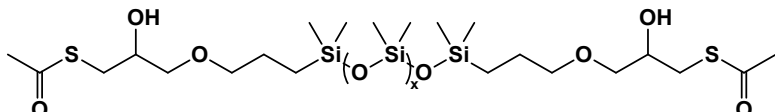

**2e:** <sup>1</sup>H NMR (400 MHz, CDCl<sub>3</sub>): δ 2.36 (s, 3H), 2.96-3.17 (m, 2H), 2.57 (m, H), 3.91 (m, H), 3.40 (m, 2H), 3.46 (m, 2H), 1.58 (m, 2H), 0.52 (m, 2H). (Figure S10)

<sup>13</sup>C NMR (400 MHz, CDCl<sub>3</sub>): δ 30.52, 196.36, 32.81, 69.68, 73.13, 74.28, 23.51, 14.23. (Figure S11)

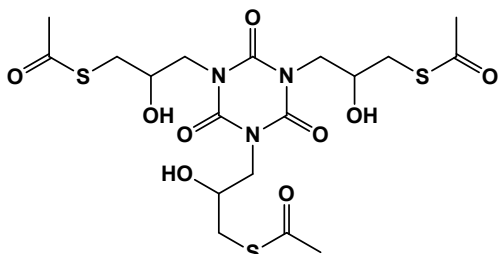

**2f:** <sup>1</sup>H NMR (400 MHz, CDCl<sub>3</sub>): δ 4.00-4.12 (m, 2H), 3.85-3.95 (m, H), 2.95-3.19 (m, 2H), 2.36 (s, 3H). (Figure S12)

<sup>13</sup>C NMR (400 MHz, *d*<sub>6</sub>-DMSO): δ 47.88, 66.68, 33.73, 195.60, 30.97, 149.72. (Figure S13)

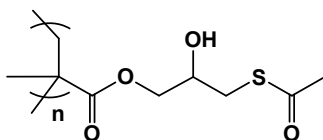

**2g:** <sup>1</sup>H NMR (400 MHz, CDCl<sub>3</sub>): δ 0.75-1.13 (br m, 3H), 1.89 (br m, 2H), 3.75-4.37 (br m, 2H), 3.75-4.37 (br m, H), 2.10 (m, H), 2.96-3.22 (br m, 2H), 2.40 (s, 3H). (Figure S14)

### General procedure for SOAM reaction to transform **2** into **3**

#### 1) Procedure employing TEA as a catalyst:

The prepared **2** (5.0 mmol) was dissolved in 16 mL of CHCl<sub>3</sub>. Then, the solution was added dropwise into a mixture of CHCl<sub>3</sub> (30 mL) and TEA (6 mL) under N<sub>2</sub> atmosphere at a concentration of 0.1 mol/L. After vigorous stirring for 6 h at 25 °C, the reaction mixture was evaporated on a rotary evaporation. The residual was diluted with diethyl ether, washed with 1 M HCl aqueous solution to remove residual TEA and deionized water, successively, dried by anhydrous MgSO<sub>4</sub>, and finally evaporated to afford **3** as a major product and **4** and **5** as minor products. The molar ratios of **3**, **4**, and **5** in the products could be obtained by comparing the integrations of proton signals of -SCOCH<sub>3</sub> and -OCOCH<sub>3</sub>. Pure products, **3a** ~ **3d**, could be acquired by flash chromatography. The products derived from **1e** ~ **1g** were mixtures. The yields were presented in Table 2.

#### 2) Procedure employing DMAP as a catalyst:

The prepared **2** (2.0 mmol) was dissolved in 5 mL of CHCl<sub>3</sub>. Then, the solution was added dropwise into a mixture of CHCl<sub>3</sub> (15 mL) and DMAP (2 mmol) under N<sub>2</sub> atmosphere at a concentration of 0.1 mol/L. After vigorous stirring for 6 h at 25 °C, the reaction mixture was evaporated on a rotary evaporation. The residual was diluted with diethyl ether, washed with 1 M HCl aqueous solution to remove residual DMAP and deionized water, successively, dried by anhydrous MgSO<sub>4</sub>, and finally evaporated to afford **3** as a major product and **4** and **5** as minor products. The molar ratios of **3**, **4**, and **5** in the products could be obtained by comparing the integrations of proton signals of -SCOCH<sub>3</sub> and -OCOCH<sub>3</sub>.

#### 3) Procedure employing DBU as a catalyst:

The prepared **2** (2.0 mmol) was dissolved in 5 mL of  $\text{CHCl}_3$ . Then, the solution was added dropwise into a mixture of  $\text{CHCl}_3$  (15 mL) and DBU (2 mmol) under  $\text{N}_2$  atmosphere at a concentration of 0.1 mol/L. After vigorous stirring for 6 h at 25 °C, the reaction mixture was evaporated on a rotary evaporation. The residual was diluted with diethyl ether, washed with 1 M HCl aqueous solution to remove residual DBU and deionized water, successively, dried by anhydrous  $\text{MgSO}_4$ , and finally evaporated to afford **3** as a major product and **4** and **5** as minor products. The molar ratios of **3**, **4**, and **5** in the products could be obtained by comparing the integrations of proton signals of  $-\text{SCOCH}_3$  and  $-\text{OCOCH}_3$ .

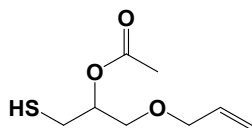

**3a**:  $^1\text{H NMR}$  (400 MHz,  $\text{CDCl}_3$ ):  $\delta$  1.47 (t, H), 2.68-2.87 (m, 2H), 4.99 (m, H), 2.09 (s, 3H), 3.56-3.68 (m, 2H), 4.01 (m, 2H), 5.83-5.94 (m, H), 5.17-5.31 (m, 2H). (Figure S15)

$^{13}\text{C NMR}$  (400 MHz,  $\text{CDCl}_3$ ):  $\delta$  24.72, 73.64, 72.26, 68.45, 134.28, 117.73, 170.44, 21.24. (Figure S16)

FTIR:  $2564\text{ cm}^{-1}$  ( $-\text{SH}$ ). (Figure S3)

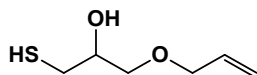

**4a**:  $^1\text{H NMR}$  (400 MHz,  $\text{CDCl}_3$ ):  $\delta$  1.47 (t, H), 2.66 (m, 2H), 3.8 (m, H), 3.49 (m, 2H), 4.03 (d, 2H), 5.81-5.98 (m, H), 5.14-5.31 (m, 2H). (Figure S17)

$^{13}\text{C NMR}$  (400 MHz,  $\text{CDCl}_3$ ):  $\delta$  28.14, 71.56, 77.75, 72.80, 134.48, 117.74. (Figure S18)

FTIR:  $2564\text{ cm}^{-1}$  ( $-\text{SH}$ ),  $3456\text{ cm}^{-1}$  ( $-\text{OH}$ ). (Figure S3)

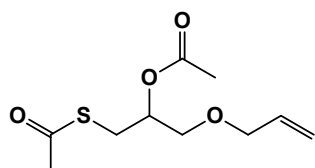

**5a**:  $^1\text{H NMR}$  (400 MHz,  $\text{CDCl}_3$ ):  $\delta$  2.34 (s, 3H), 3.04-3.32 (m, 2H), 5.04-5.24 (m, H), 3.53 (d, 2H), 3.99 (d, 2H), 5.81-5.93 (m, H), 5.30 (d, 2H), 2.34 (s, 3H). (Figure S19)

$^{13}\text{C NMR}$  (400 MHz,  $\text{CDCl}_3$ ):  $\delta$  30.13, 195.26, 30.91, 70.07, 71.23, 72.74, 134.42, 117.72, 170.43, 21.19. (Figure S20)

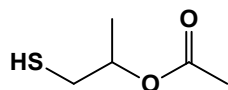

**3b**:  $^1\text{H NMR}$  (400 MHz,  $\text{CDCl}_3$ ):  $\delta$  1.39 (m, H), 2.57-2.73 (m, 2H), 4.91 (m, H), 1.28 (d, 2H), 2.03 (s, 3H). (Figure S21)

$^{13}\text{C NMR}$  (400 MHz,  $\text{CDCl}_3$ ):  $\delta$  30.25, 72.29, 19.18, 170.81, 21.98. (Figure S22)

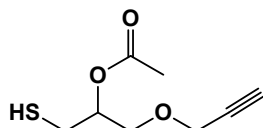

**3c**:  $^1\text{H NMR}$  (400 MHz,  $\text{CDCl}_3$ ):  $\delta$  1.45 (t, H), 2.65-2.86 (m, 2H), 4.93-5.03 (m, H), 3.63-3.81 (m, 2H), 4.17 (s, 2H), 2.45 (m, H), 2.06 (s, 3H). (Figure S23)

$^{13}\text{C NMR}$  (400 MHz,  $\text{CDCl}_3$ ):  $\delta$  24.76, 69.09, 73.21, 58.51, 75.22, 79.33, 170.41, 21.33. (Figure S24)

FTIR:  $2564\text{ cm}^{-1}$  ( $-\text{SH}$ ). (Figure S7)

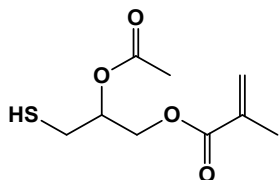

**3d**:  $^1\text{H NMR}$  (400 MHz,  $\text{CDCl}_3$ ):  $\delta$  1.53 (t, H), 2.78 (m, 2H), 5.13 (m, H), 4.26-4.43 (m, 2H), 5.61, 6.12 (s, 2H), 1.95 (s, 3H), 2.09 (s, 3H). (Figure S25)

$^{13}\text{C NMR}$  (400 MHz,  $\text{CDCl}_3$ ):  $\delta$  23.67, 71.22, 62.26, 165.29, 134.96, 125.66, 17.13, 169.07, 20.21. (Figure S26)

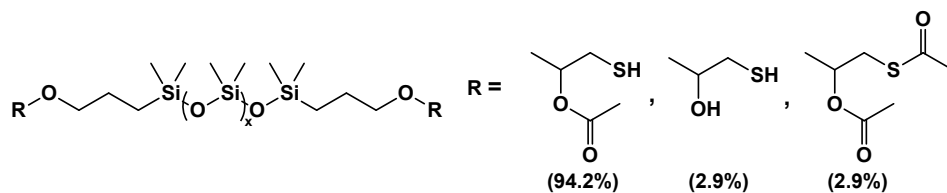

(3,4,5)e:  $^1\text{H}$  NMR (400 MHz,  $\text{CDCl}_3$ ):  $\delta$  1.44 (t, H), 2.70-2.88 (m, 2H), 5.00 (m, H), 3.55-3.70 (m, 2H), 3.36-3.52 (m, 2H), 1.62 (m, 2H), 0.45-0.58 (m, 2H), 2.10 (s, 3H). (Figure S27)

$^{13}\text{C}$  NMR (400 MHz,  $\text{CDCl}_3$ ):  $\delta$  25.04, 69.67, 73.72, 74.65, 23.48, 14.18, 170.76, 21.30. (Figure S28)

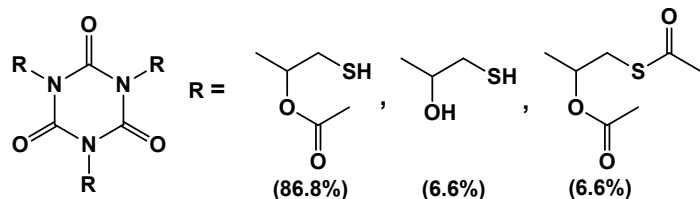

(3,4,5)f:  $^1\text{H}$  NMR (400 MHz,  $\text{CDCl}_3$ ):  $\delta$  4.10 (m, 2H), 5.16 (m, H), 2.75 (m, 2H), 1.64 (m, H), 2.05 (s, 3H), 4.19 (m, 3H), 3.96 (m, H), 2.72 (m, 2H), 1.63 (m, H), 4.29 (m, 3H), 5.34 (m, H), 2.98 (m, 2H), 2.36 (s, 3H), 2.02 (s, 3H). (Figure S29)

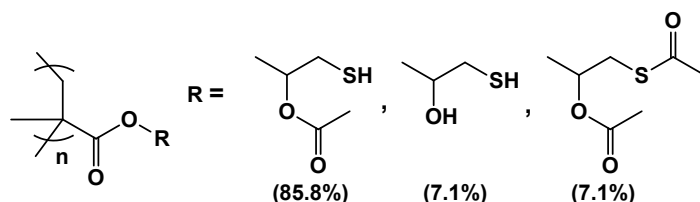

(3,4,5)g:  $^1\text{H}$  NMR (400 MHz,  $\text{CDCl}_3$ ):  $\delta$  0.86, 1.02 (m, 3H), 1.82 (m, 2H), 3.86-4.43 (m, 3H), 5.08 (m, H), 2.77 (m, 2H), 1.61 (m, H), 2.12 (s, 3H), 5.33 (m, H), 3.10, 3.25 (m, 2H), 2.38 (s, 3H). (Figure S30)

FTIR: 2564  $\text{cm}^{-1}$  (-SH), 3456  $\text{cm}^{-1}$  (-OH). (Figure S31)

GPC: PGMA (Mn=17122, Mw=50478), 2g (Mn=15284, Mw=30280), 3g (Mn=9642, Mw=14514). (Figure S32)

Table S1. The yield of migration reactions catalyzed by different amines.

| Catalyst | Yield (%) |      |      |     |                          |      |      |     |
|----------|-----------|------|------|-----|--------------------------|------|------|-----|
|          | 3         |      | 4    |     | Total thiol groups (3+4) |      | 5    |     |
|          | 1a        | 1f   | 1a   | 1f  | 1a                       | 1f   | 1a   | 1f  |
| TEA      | 90.8      | 86.8 | 4.6  | 6.6 | 95.4                     | 93.4 | 4.6  | 6.6 |
| DMAP     | 80.6      | 83.4 | 9.7  | 8.3 | 90.3                     | 91.7 | 9.7  | 8.3 |
| DBU      | 76.8      | 82.0 | 11.6 | 9.0 | 88.4                     | 91.0 | 11.6 | 9.0 |

### Diluted solution and slow addition operation for improving the yield of 3a from 2a

**2a** (1.0 g, 5.2 mmol) was dissolved in 4 mL of  $\text{CHCl}_3$  and the solution was added very slowly into a mixture of  $\text{CHCl}_3$  (150 mL) and TEA (30 mL) in a speed of 1 mL/h by using a Laboratorial Syringe Pump (Baoding Longer Precision Pump Co., Ltd.). After the addition, the reaction system was stirred for another 2 h. All the volatiles were removed under reduced pressure. The residual was diluted with diethyl ether, washed with 1 M HCl aqueous solution to remove residual TEA and deionized water, successively, dried by anhydrous  $\text{MgSO}_4$ , and finally evaporated. Before applying flash chromatography, the residual was characterized by  $^1\text{H}$  NMR. By comparing the integrations of proton signals of - $\text{SCOCH}_3$  and - $\text{OCOCH}_3$ , the yield of **3a** was above 97%.

### Thiol-click reactions of 3b with five selected compounds to test the reactivity of the thiol group

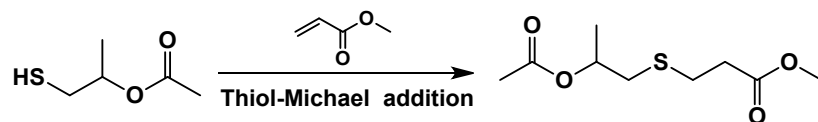

**3b** (0.2 g, 1.5 mmol) and methyl acrylate (0.17 g, 2.0 mmol) were dissolved in 2 mL of  $\text{CH}_2\text{Cl}_2$ . A  $\text{CH}_2\text{Cl}_2$  (1 mL) solution of TEA (10 mg) was added dropwise into this solution. After vigorous stirring for 3 h at room temperature, 20 mL of diethyl ether was added and the mixture was washed with 1 M HCl and deionised water. The organic phase was dried over anhydrous  $\text{MgSO}_4$ , and then all the volatiles

were removed on a rotary evaporator at 0 °C to afford 0.32 g of the product (97%).

**3b-1:** <sup>1</sup>H NMR (400 MHz, CDCl<sub>3</sub>): δ 1.26 (d, 3H), 4.96 (m, H), 2.67 (m, 2H), 2.78 (m, 2H), 2.57 (m, 2H), 3.65 (s, 3H), 2.00 (s, 3H). (Figure S33)

<sup>13</sup>C NMR (400 MHz, CDCl<sub>3</sub>): δ 19.59, 70.58, 28.20, 38.19, 35.43, 171.17, 52.32, 173.24, 21.66. (Figure S34)

Electrospray ionization mass spectroscopy (ESI-MS) (product + Na<sup>+</sup>): 242.8 Da (calculated: 243.1 Da). (Figure S35)

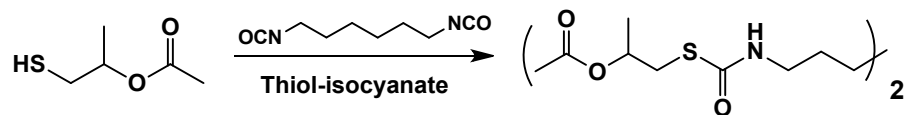

**3b** (0.60 g, 4.5 mmol) and 1,6-diisocyanatohexane (0.34 g, 2.0 mmol) were dissolved in 5 mL of diethyl ether. TEA (16 μL) was injected into this solution. After vigorous stirring for 3 h at room temperature, 40 mL of diethyl ether was added and the mixture was washed with 1 M HCl and deionised water. The organic phase was dried over anhydrous MgSO<sub>4</sub>, and then all the volatiles were removed on a rotary evaporator at 0 °C. The residual was purified using flash chromatography and 0.82 g of the product was obtained (99%).

**3b-2:** <sup>1</sup>H NMR (400 MHz, CDCl<sub>3</sub>): δ 1.02-1.39 (m, 3H), 4.87-5.06 (m, H), 2.92-3.21 (m, 2H), 2.03 (s, 3H), 3.10-3.34 (m, 2H), 1.39-1.60 (m, 2H), 1.30 (m, 2H). (Figure S36)

<sup>13</sup>C NMR (400 MHz, CDCl<sub>3</sub>): δ 19.66, 70.64, 35.16, 166.72, 41.71, 30.00, 26.55, 171.21, 22.08. (Figure S37)

Electrospray ionization mass spectroscopy (ESI-MS) (product + Na<sup>+</sup>): 459.1 Da (calculated: 459.2 Da). (Figure S38)

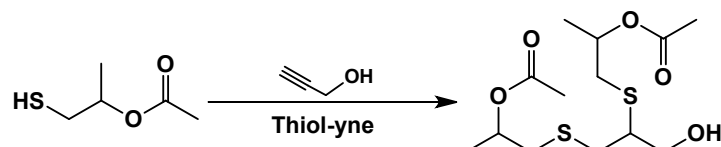

**3b** (0.295 g, 2.2 mmol), propargyl alcohol (56 mg, 1.0 mmol) and 2,2'-azobisisobutyronitrile (8.2 mg, 0.05 mmol) were dissolved in 5 mL of toluene in a 25 mL flask. After being purged with N<sub>2</sub>, the flask was placed in an oil bath at 70 °C for 3 h. All the volatiles were removed on a rotary evaporator. The residual was purified using flash chromatography and 0.31 g of the product was obtained (95%).

**3b-3:** <sup>1</sup>H NMR (400 MHz, CDCl<sub>3</sub>): δ 1.23 (m, 3H), 4.93 (m, H), 2.50-2.72 (m, 2H), 1.98 (s, 3H), 2.72-2.84 (m, 2H), 2.84-3.07 (m, H), 3.62-3.75 (m, 2H). (Figure S39)

<sup>13</sup>C NMR (400 MHz, CDCl<sub>3</sub>): δ 63.71, 49.92, 38.64, 35.50, 70.61, 19.81, 171.26, 22.00. (Figure S40)

Electrospray ionization mass spectroscopy (ES-MS) (product + Na<sup>+</sup>): 346.9 Da (calculated: 347.1 Da). (Figure S41)

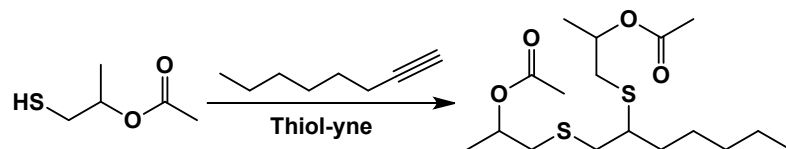

**3b** (0.295 g, 2.2 mmol), 1-octyne (56 mg, 1.0 mmol), 2,2-dimethoxy-2-phenylacetophenone (8.2 mg, 0.05 mmol) and tetrahydrofuran (4 mL) were charged into a 25 mL flask. After being purged with N<sub>2</sub>, the flask was placed under a UV lamp (8 W) at 25 °C for 1 h. Then, tetrahydrofuran was removed by rotary evaporation. The residual was purified using flash chromatography and 0.35 g of the product was obtained (96%).

**3b-4:** <sup>1</sup>H NMR (400 MHz, CDCl<sub>3</sub>): δ 2.04 (s, 3H), 4.87-5.05 (m, H), 1.30 (d, 3H), 2.02 (d, 2H), 2.81-2.94 (m, 2H), 2.62-2.81 (m, H), 1.67-1.86 (m, 2H), 1.26-1.56 (m, 2H, 2H, 2H, 2H), 0.86 (m, 3H). (Figure S42)

<sup>13</sup>C NMR (400 MHz, CDCl<sub>3</sub>): δ 170.33, 18.87, 69.98, 35.82, 38.64, 46.16, 33.31, 26.39, 28.89, 32.03, 22.63, 13.54. (Figure S43)

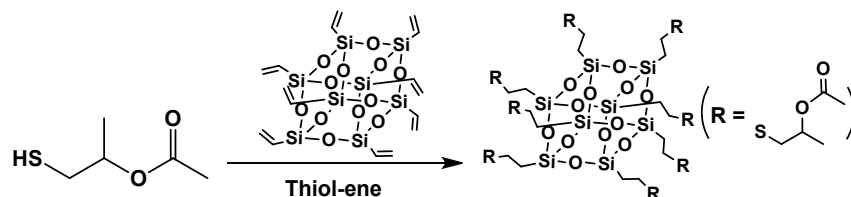

**3b** (0.295 g, 2.2 mmol), octavinyl-T8-silsesquioxane (56 mg, 1.0 mmol), 2,2-dimethoxy-2-phenylacetophenone (8.2 mg, 0.05 mmol) and tetrahydrofuran (4 mL) were charged into a 25 mL flask. After being purged with N<sub>2</sub>, the flask was placed under a UV lamp (8 W) at 25 °C for 1 h. Then, tetrahydrofuran was removed by rotary evaporation. The residual was purified using flash chromatography and 0.35 g of the product was obtained (96%).

**3b-5:** <sup>1</sup>H NMR (400 MHz, CDCl<sub>3</sub>): δ 0.89-1.06 (m, 2H), 2.70 (m, 2H), 2.50-2.64 (m, 2H), 4.92-5.04 (m, H), 1.20-1.34 (d, 3H), 2.01 (s, 3H). (Figure S44)

<sup>13</sup>C NMR (400 MHz, CDCl<sub>3</sub>): δ 13.54, 27.02, 37.69, 70.29, 19.80, 170.95, 22.00. (Figure S45)

## One-pot two-step processes

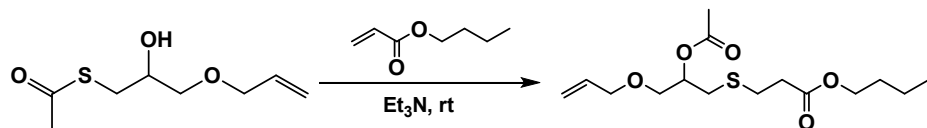

6 mL of TEA, 30 mL of tetrahydrofuran, and 256 mg of *n*-butyl acrylate (2.0 mmol) were mixed. At room temperature, **2a** (0.46 g, 2.4 mmol) was added dropwise to this mixture. After being stirred for 5 h, all the volatiles were removed by rotary evaporation. The residual was purified using flash chromatography and 0.56 g of the product was obtained (88%).

**2a-1**:  $^1\text{H NMR}$  (400 MHz,  $\text{CDCl}_3$ ):  $\delta$  5.29-5.17 (m, 2H), 5.92-5.83 (m, H), 4.04-3.96 (m, 2H), 3.65-3.55 (m, 2H), 5.09-5.03 (m, H), 2.75-2.68 (m, 2H), 2.63-2.59 (m, 2H), 2.84-2.79 (m, 2H), 4.11-4.07 (t, 2H), 1.64-1.57 (m, 2H), 1.42-1.33 (m, 2H), 0.94-0.91 (t, 3H), 2.08 (s, 3H). (Figure S46)

$^{13}\text{C NMR}$  (400 MHz,  $\text{CDCl}_3$ ):  $\delta$  116.96, 134.28, 72.01, 71.80, 69.27, 32.06, 27.39, 34.61, 117.51, 64.09, 30.51, 18.98, 13.53, 170.05. (Figure S47)

Electrospray ionization mass spectroscopy (ESI-MS) (product +  $\text{NH}_4^+$ ): 336.3 Da (calculated: 336.1 Da). (Figure S48)

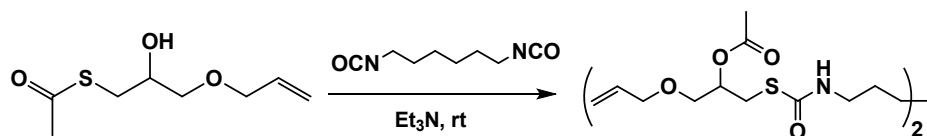

6 mL of TEA, 30 mL of dried tetrahydrofuran, and 1,6-diisocyanatohexane (0.34 g, 2.0 mmol) were mixed in a 100 mL flask. **2a** (0.95 g, 5.0 mmol) was added dropwise to the mixture. After reacting for 5 h, all the volatiles were removed under reduced pressure. The residual was purified using flash chromatography and 0.89 g of the product was obtained (81%).

**2a-2**:  $^1\text{H NMR}$  (400 MHz,  $\text{CDCl}_3$ ):  $\delta$  5.30-5.18 (m, 2H), 5.92-5.83 (m, H), 4.06-3.96 (m, 2H), 3.63-3.57 (m, 2H), 5.14-5.09 (m, H), 3.20-3.06 (m, 2H), 5.63 (s, H), 3.32-3.28 (m, 2H), 1.52-1.51 (m, 2H), 1.34 (m, 2H), 2.10 (s, H). (Figure S48)

$^{13}\text{C NMR}$  (400 MHz,  $\text{CDCl}_3$ ):  $\delta$  117.03, 134.21, 77.83, 71.90, 69.56, 29.96, 165.81, 41.10, 29.28, 26.01, 20.90, 170.23. (Figure S49)

Electrospray ionization mass spectroscopy (ESI-MS) (product +  $\text{Na}^+$ ): 571.5 Da (calculated: 571.2 Da). (Figure S51)

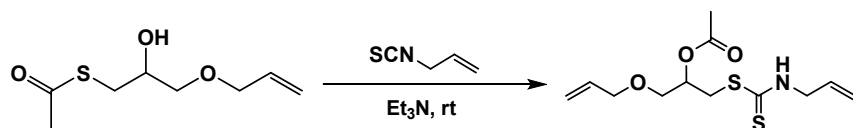

6 mL of TEA, 30 mL of dried tetrahydrofuran, and allyl isothiocyanate (0.17 g, 2.0 mmol) were mixed in a 100 mL flask. **2a** (0.48 g, 2.5 mmol) was added dropwise to the mixture. After reacting for 5 h, all the volatiles were removed under reduced pressure. The residual was purified using flash chromatography and 0.50 g of the product was obtained (86%).

**2a-3**:  $^1\text{H NMR}$  (400 MHz,  $\text{CDCl}_3$ ):  $\delta$  5.28-5.17 (m, 2H), 5.93-5.81 (m, 2H), 4.01-3.97 (t, 2H), 3.63-3.62 (m, 2H), 5.09-5.06 (m, H), 3.55-3.36 (m, 2H), 7.83 (s, H), 4.36-4.34 (t, 2H), 5.93-5.81 (m, H), 5.28-5.17 (m, 2H), 2.07 (s, 3H). (Figure S50)

$^{13}\text{C NMR}$  (400 MHz,  $\text{CDCl}_3$ ):  $\delta$  117.19, 134.16, 71.98, 71.58, 69.54, 35.08, 196.17, 49.43, 132.00, 117.73, 20.93, 170.51. (Figure S51)

Electrospray ionization mass spectroscopy (ESI-MS) (product +  $\text{Na}^+$ ): 312.3 Da (calculated: 312.1 Da). (Figure S54)

## Preparation of the latent polythiols

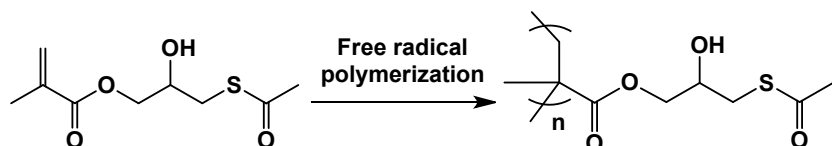

To a 25 mL flask, **2d** (3.27 g, 15.0 mmol), 2,2'-azobisisobutyronitrile (24.6 mg, 0.15 mmol) and freshly distilled toluene (3 mL) were charged. The flask was sealed with rubber septum, purged with  $\text{N}_2$ , and placed in an oil bath at 68  $^\circ\text{C}$  for 10 h. The reaction solution was poured into cold diethyl ether (0  $^\circ\text{C}$ ). The obtained solids were further purified by dissolution and precipitation twice, and finally dried in vacuo at room temperature. 2.53 g of latent polythiols was obtained (77%).

## Postfunctionalization of the latent polythiols employing one-pot two-step processes

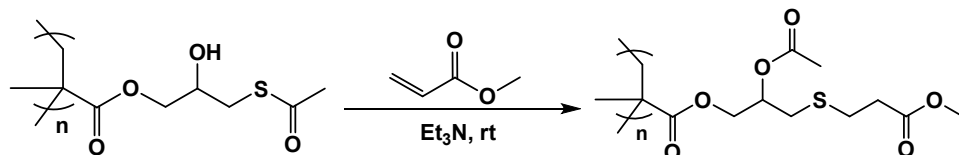

The latent polythiols (0.44 g) was dissolved in 10 mL of  $\text{CH}_2\text{Cl}_2$ . Methyl acrylate (0.26 g, 3.0 mmol), TEA (6 mL), and  $\text{CH}_2\text{Cl}_2$  (30 mL) were mixed. To this mixture, the latent polythiols was added dropwise. After reacting for 5 h, the reaction mixture was concentrated and poured into cold methanol (0  $^\circ\text{C}$ ). The obtained solids were further purified by dissolution and precipitation twice, and finally dried in vacuo at room temperature to give 0.55 g of the addition product.

**2d-1:**  $^1\text{H NMR}$  (400 MHz,  $\text{CDCl}_3$ ):  $\delta$  0.85 (br s, 3H), 1.02 (br s, 3H), 1.90 (br m, 2H), 4.07 (br m, 2H), 5.15 (br s, H), 2.75 (br s, 2H), 2.10 (br m, 3H), 2.84 (br s, 2H), 2.64 (br s, 2H), 3.69 (br s, 3H). (Figure S52)

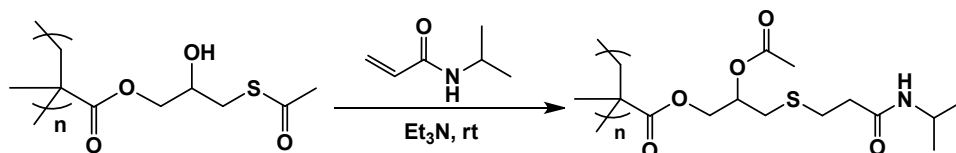

The latent polythiols (0.44 g) was dissolved in 10 mL of  $\text{CH}_2\text{Cl}_2$ . N-isopropylacrylamide (0.34 g, 3.0 mmol), TEA (6 mL), and  $\text{CH}_2\text{Cl}_2$  (30 mL) were mixed. To this mixture, the latent polythiols was added dropwise. After reacting for 5 h, the reaction mixture was concentrated and poured into cold diethyl ether ( $0\text{ }^\circ\text{C}$ ). The obtained solids were further purified by dissolution and precipitation twice, and finally dried in vacuo at room temperature to give 0.62 g of the addition product.

**2d-2:**  $^1\text{H NMR}$  (400 MHz,  $\text{CDCl}_3$ ):  $\delta$  0.70-1.09 (br s, 3H), 1.75-2.02 (br m, 2H), 4.11-4.44 (br m, 2H), 5.15 (br s, H), 2.77 (br s, 2H), 2.12 (br s, 3H), 2.88 (br s, 2H), 2.47 (br s, 2H), 5.52 (br s, H), 1.15 (br d, 3H), 3.89-4.12 (br m, H). (Figure S53)

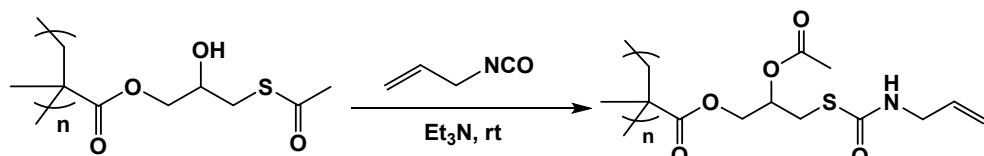

The latent polythiols (0.44 g) was dissolved in 10 mL of  $\text{CH}_2\text{Cl}_2$ . Allyl isocyanate (0.21 g, 2.5 mmol), TEA (6 mL), and  $\text{CH}_2\text{Cl}_2$  (30 mL) were mixed. To this mixture, the latent polythiols was added dropwise. After reacting for 5 h, the reaction mixture was concentrated and poured into cold diethyl ether ( $0\text{ }^\circ\text{C}$ ). The obtained solids were further purified by dissolution and precipitation twice, and finally dried in vacuo at room temperature to give 0.59 g of the addition product.

**2d-3:**  $^1\text{H NMR}$  (400 MHz,  $\text{CDCl}_3$ ):  $\delta$  0.85 (br s, 3H), 1.25 (br s, 3H), 1.8 (br m, 2H), 4.17 (br m, 2H), 5.18 (br m, H), 3.22 (br m, 2H), 6.52 (br s, H), 3.93 (br s, 2H), 5.84 (br m, H), 5.21 (br m, 2H). (Figure S54)

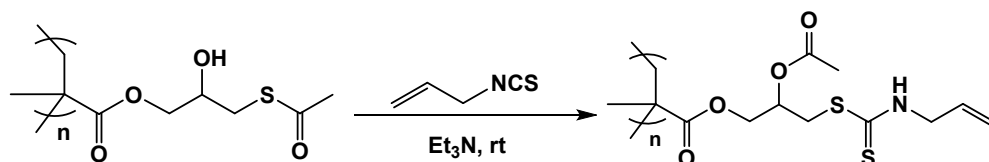

The latent polythiols (0.44 g) was dissolved in 10 mL of  $\text{CH}_2\text{Cl}_2$ . Allyl isothiocyanate (0.25 g, 2.5 mmol), TEA (6 mL), and  $\text{CH}_2\text{Cl}_2$  (30 mL) were mixed. To this mixture, the latent polythiols was added dropwise. After reacting for 5 h, the reaction mixture was concentrated and poured into cold diethyl ether ( $0\text{ }^\circ\text{C}$ ). The obtained solids were further purified by dissolution and precipitation twice, and finally dried in vacuo at room temperature to give 0.54 g of the addition product.

**2d-4:**  $^1\text{H NMR}$  (400 MHz,  $\text{CDCl}_3$ ):  $\delta$  0.88 (br s, 3H), 1.06 (br s, 3H), 1.97 (br m, 2H), 4.12 (br m, 2H), 5.28 (br m, H), 3.61 (br m, 2H), 8.12 (br s, H), 4.39 (br s, 2H), 5.33 (br m, H), 5.93 (br s, 2H), 2.12 (br s, 3H). (Figure S55)

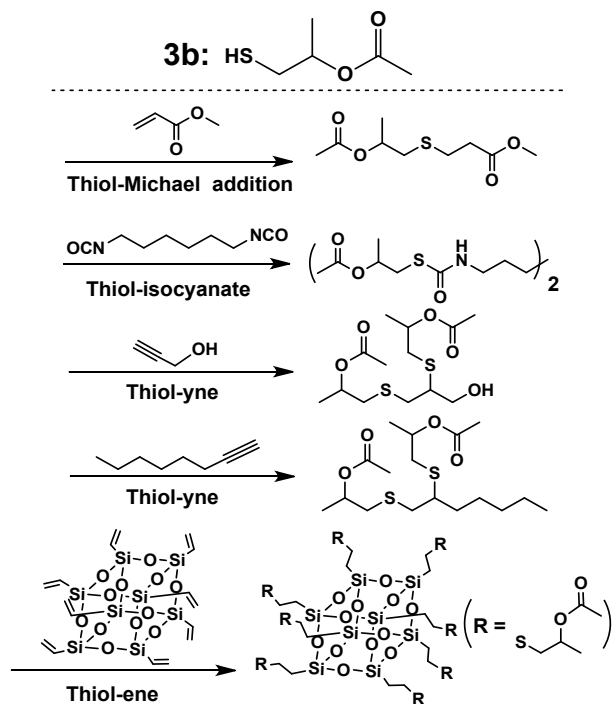

Scheme S1. Thiol-click reactions of 3b with five selected compounds.

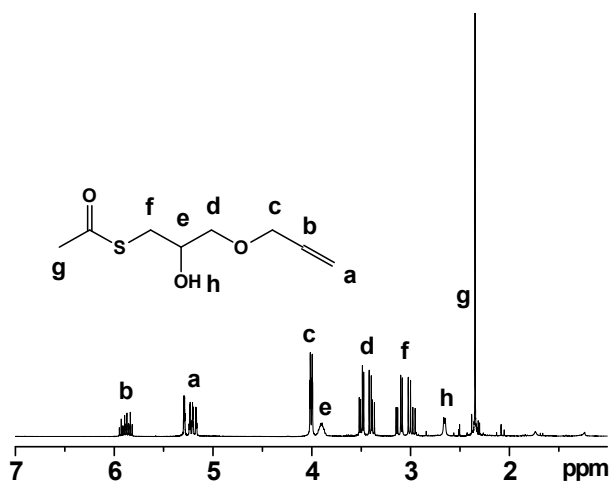

Figure S1. <sup>1</sup>H NMR spectrum of 2a.



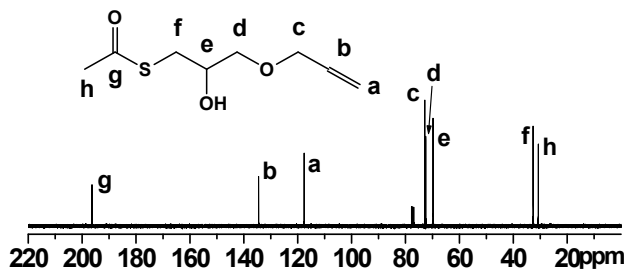

Figure S2.  $^{13}\text{C}$  NMR spectrum of **2a**.

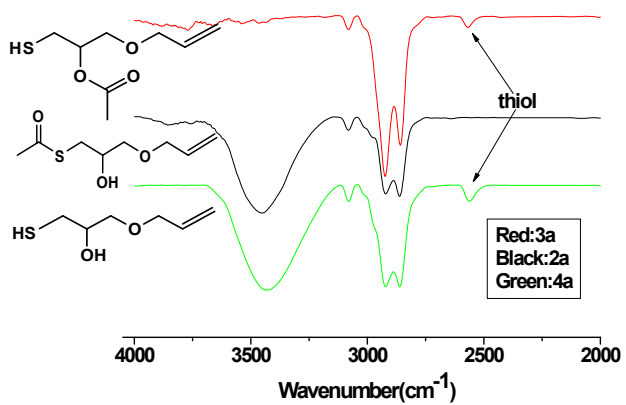

Figure S3. FTIR spectra of **2a**, **3a** and **4a**.

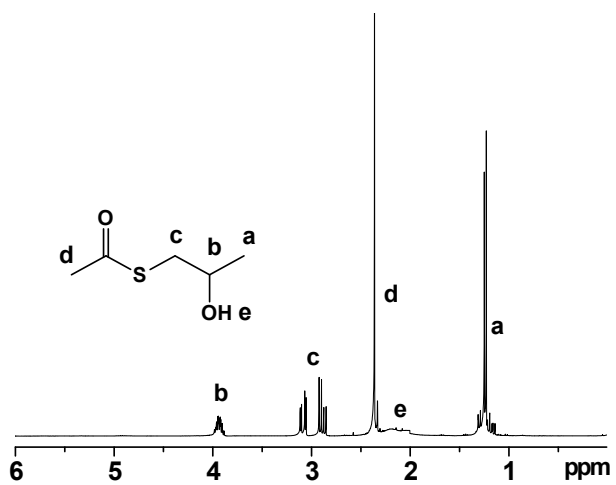

Figure S4.  $^1\text{H}$  NMR spectrum of **2b**.

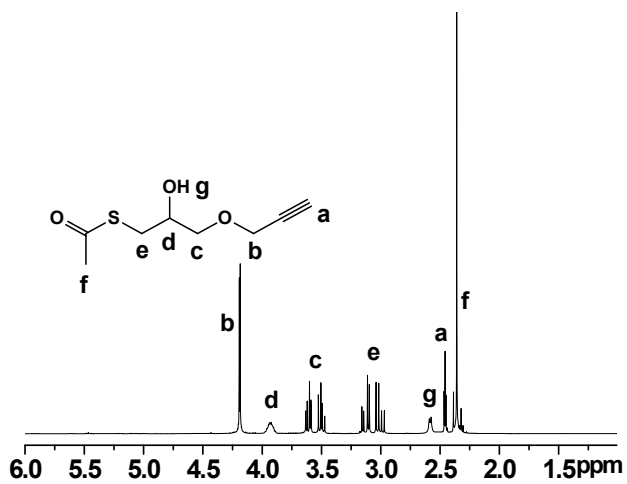

Figure S5.  $^1\text{H}$  NMR spectrum of **2c**.

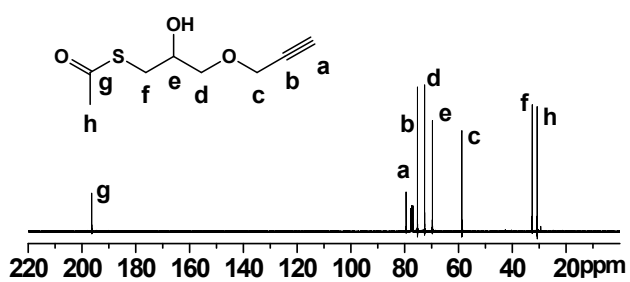

Figure S6.  $^{13}\text{C}$  NMR spectrum of **2c**.

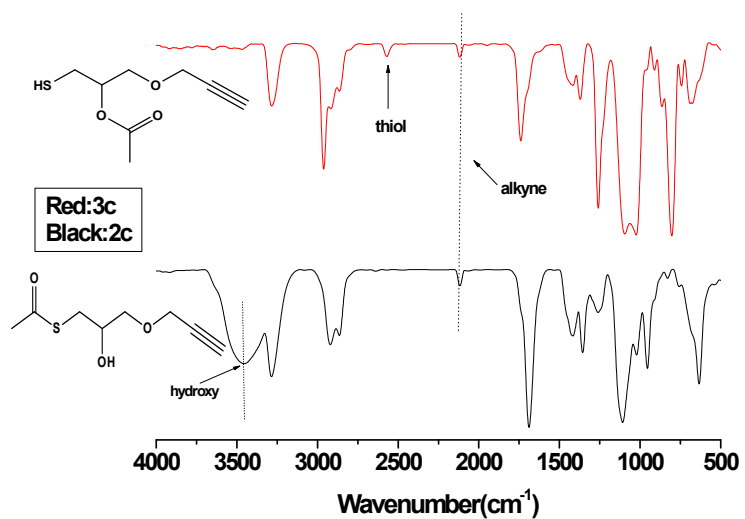

Figure S7. FTIR spectra of **2c** and **3c**.

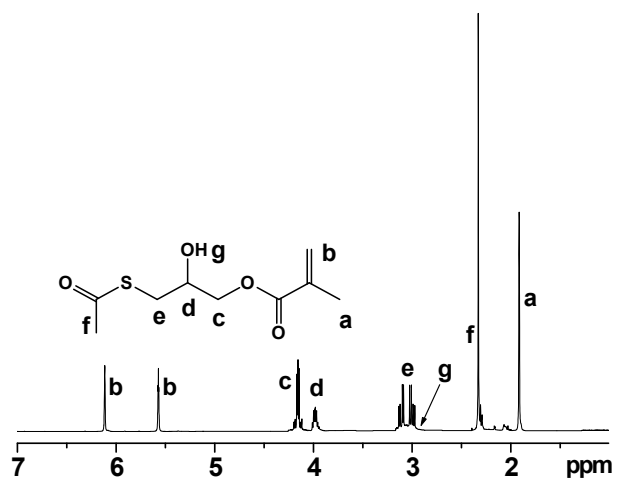

Figure S8.  $^1\text{H}$  NMR spectrum of **2d**.

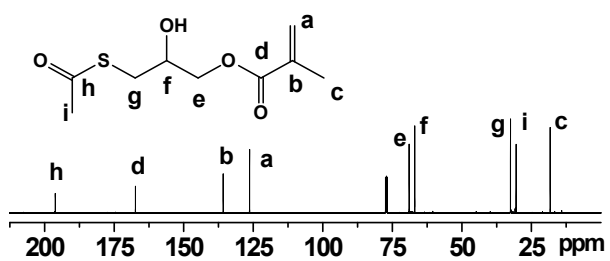

Figure S9.  $^{13}\text{C}$  NMR spectrum of **2d**.

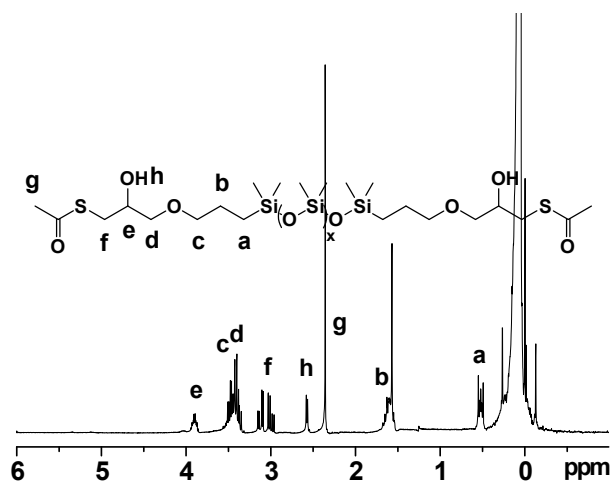

Figure S10.  $^1\text{H}$  NMR spectrum of **2e**.

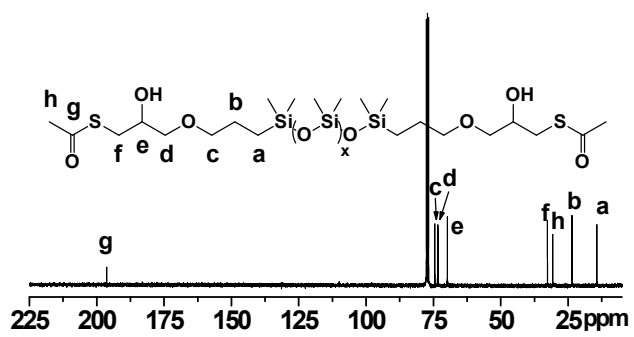

Figure S11.  $^{13}\text{C}$  NMR spectrum of **2e**.

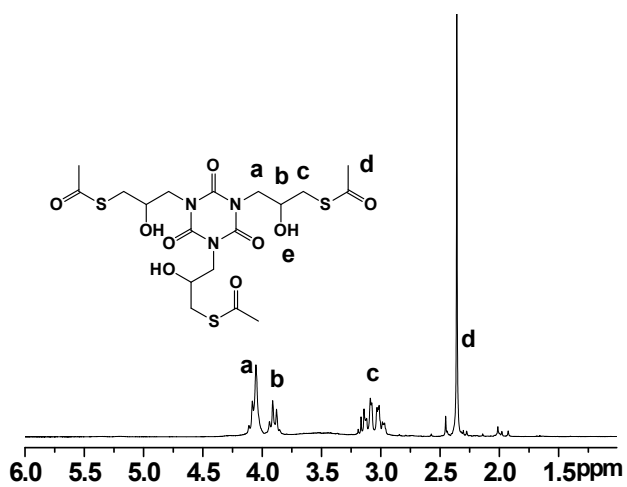

Figure S12.  $^1\text{H}$  NMR spectrum of **2f**.

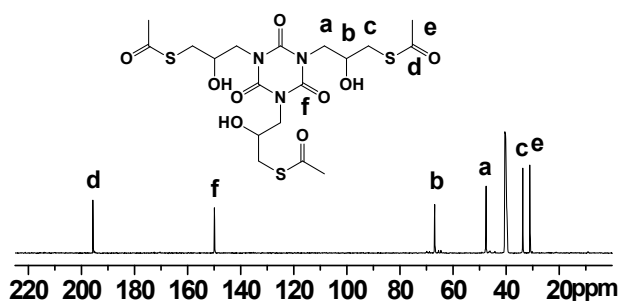

Figure S13.  $^{13}\text{C}$  NMR spectrum of **2f**.

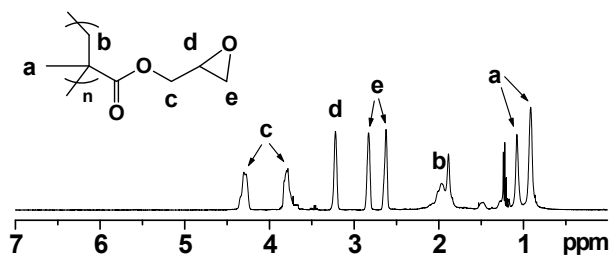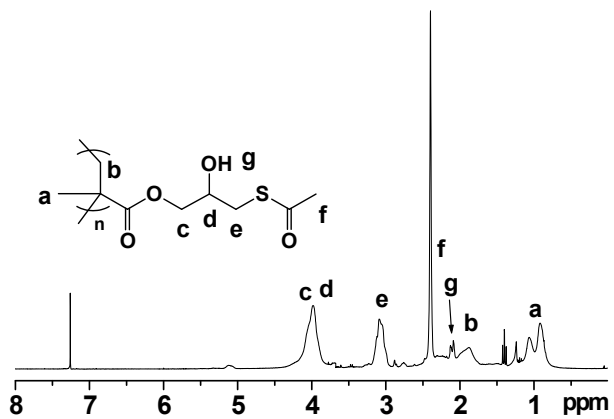

Figure S14.  $^1\text{H}$  NMR spectrum of **2g**.

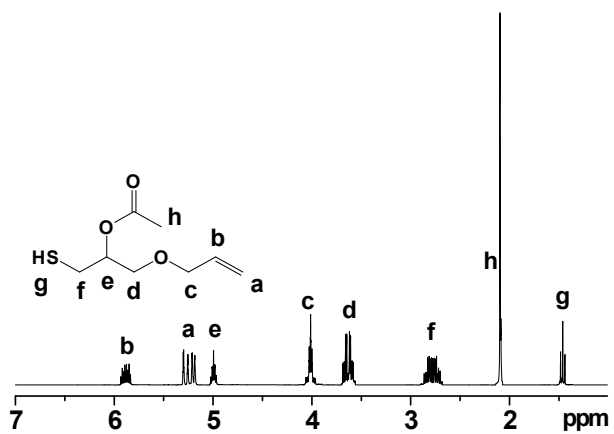

Figure S15.  $^1\text{H}$  NMR spectrum of **3a**.

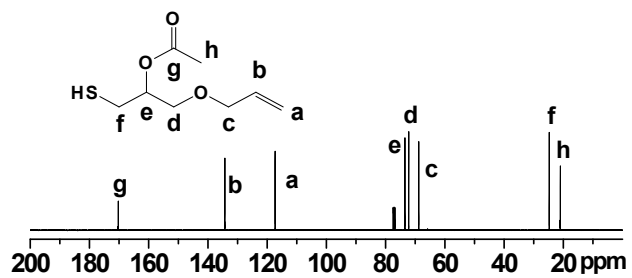

Figure S16. <sup>13</sup>C NMR spectrum of 3a.

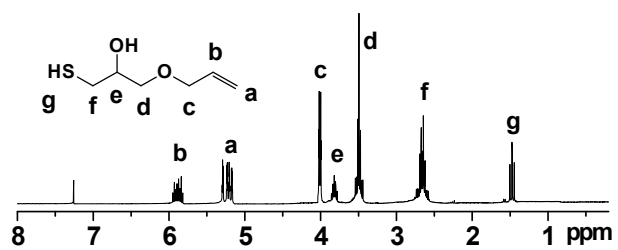

Figure S17. <sup>1</sup>H NMR spectrum of 4a.

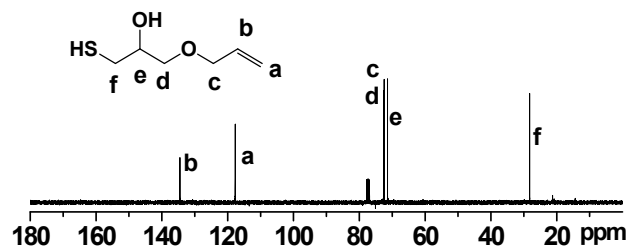

Figure S18. <sup>13</sup>C NMR spectrum of 4a.

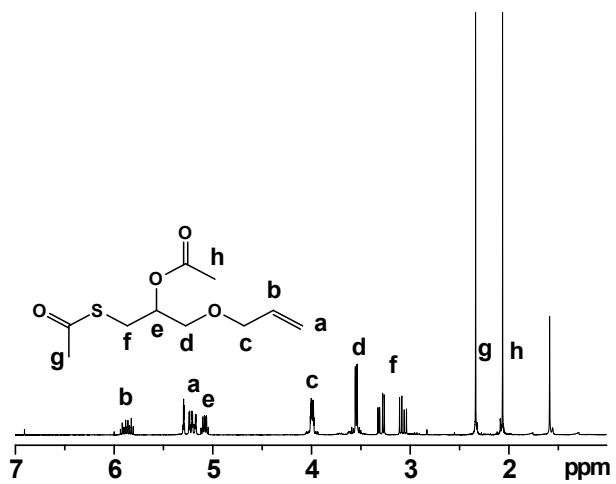

Figure S19.  $^1\text{H}$  NMR spectrum of **5a**.

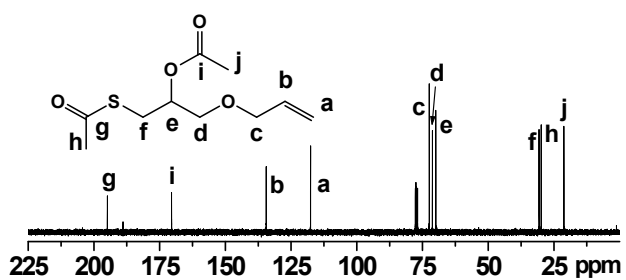

Figure S20.  $^{13}\text{C}$  NMR spectrum of **5a**.

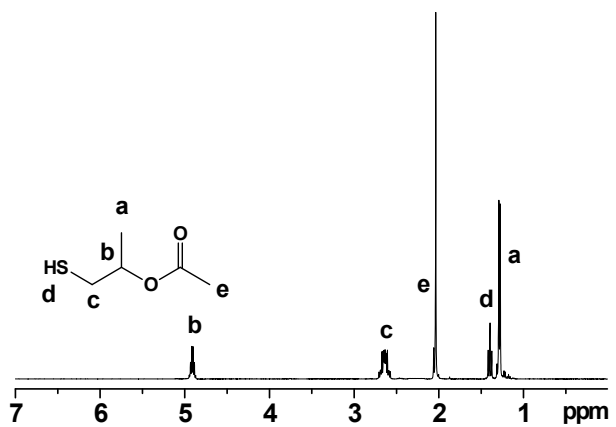

Figure S21.  $^1\text{H}$  NMR spectrum of **3b**.

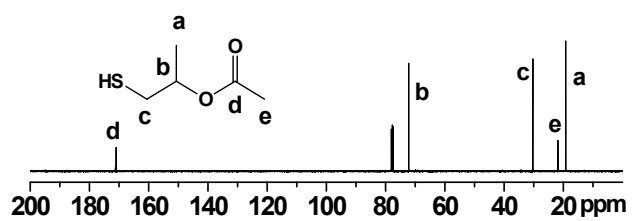

Figure S22. <sup>13</sup>C NMR spectrum of 3b.

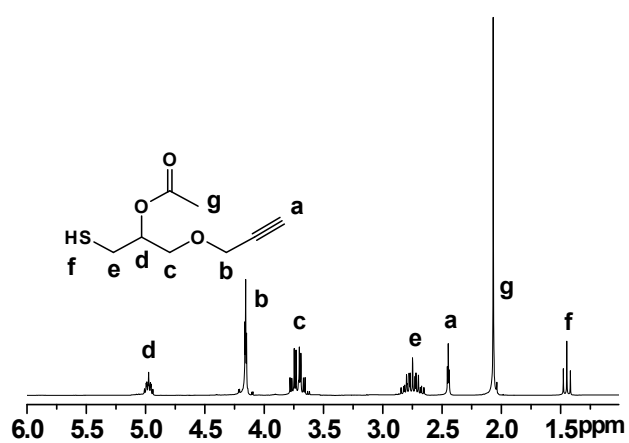

Figure S23. <sup>1</sup>H NMR spectrum of 3c.

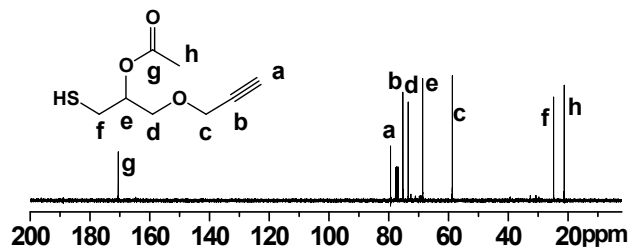

Figure S24. <sup>13</sup>C NMR spectrum of 3c.



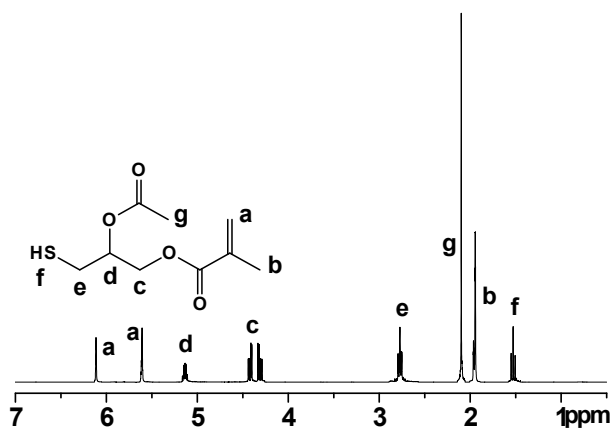

Figure S25. <sup>1</sup>H NMR spectrum of 3d.

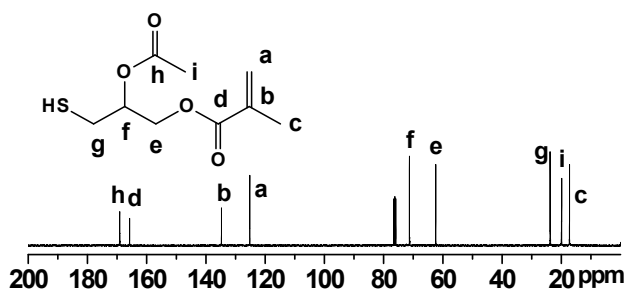

Figure S26. <sup>13</sup>C NMR spectrum of 3d.

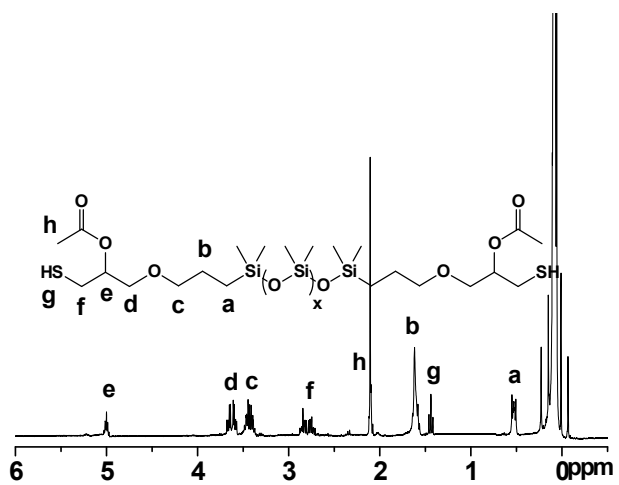

Figure S27. <sup>1</sup>H NMR spectrum of (3, 4, 5)e.

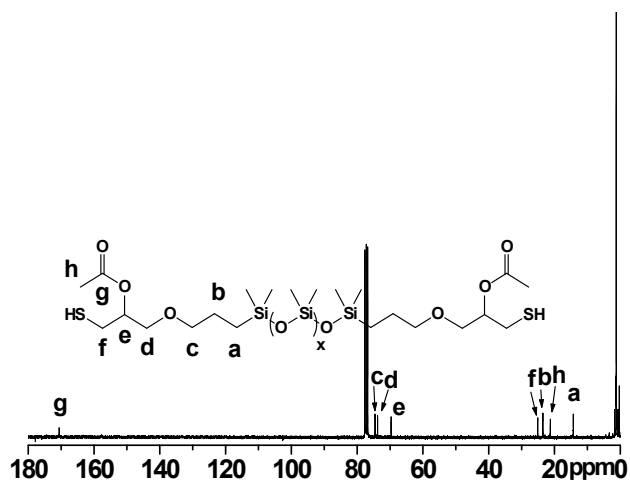

Figure S28.  $^{13}\text{C}$  NMR spectrum of (3, 4, 5)e.

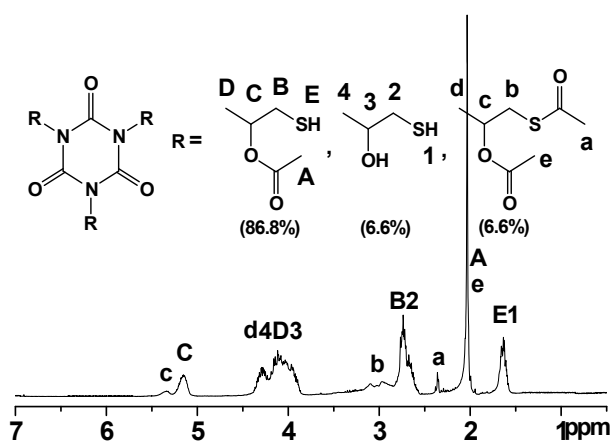

Figure S29.  $^1\text{H}$  NMR spectrum of (3, 4, 5)f.

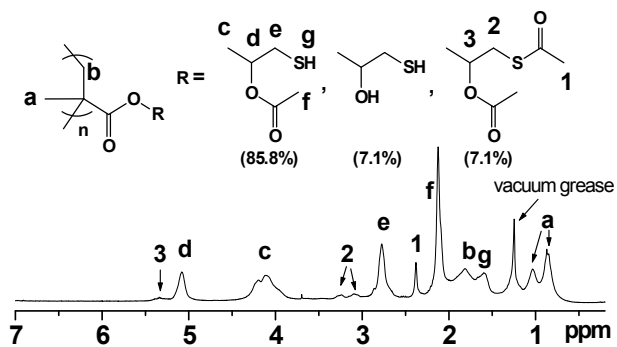

Figure S30.  $^1\text{H}$  NMR spectrum of (3, 4, 5)g.

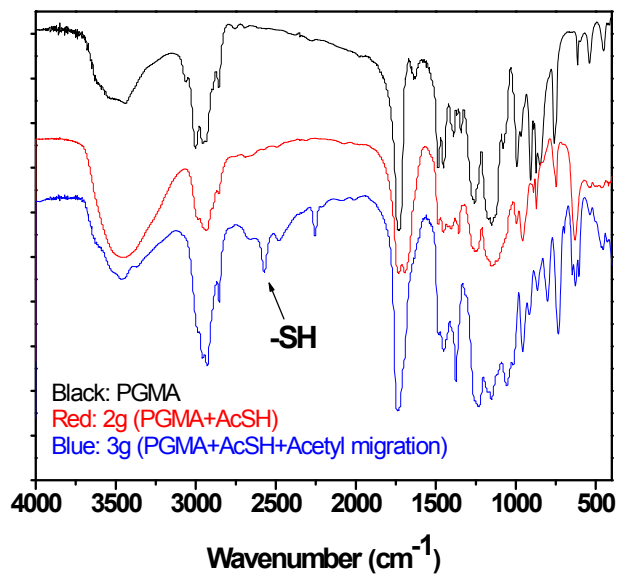

Figure S31. FTIR spectra of PGMA, 2g and 3g.

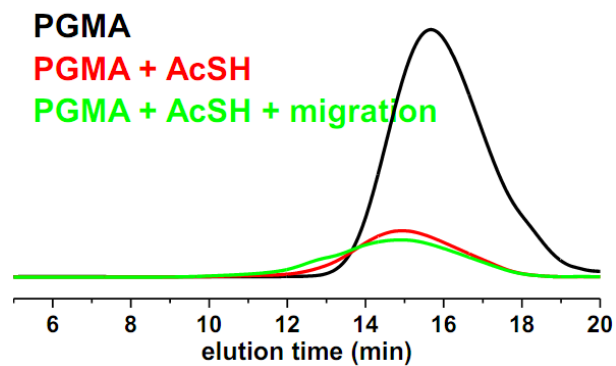

Figure S32. GPC curves of PGMA, 2g and 3g.

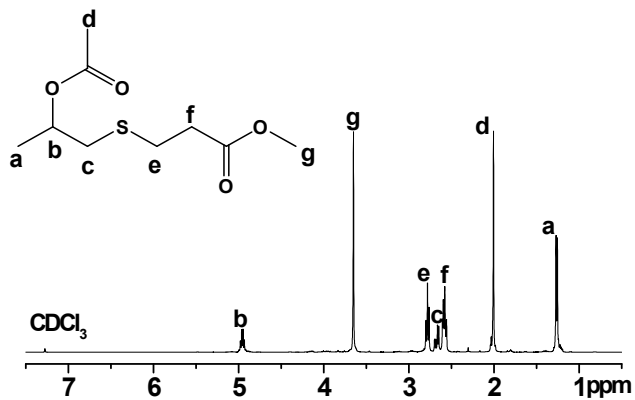

Figure S33. <sup>1</sup>H NMR spectrum of 3b-1.

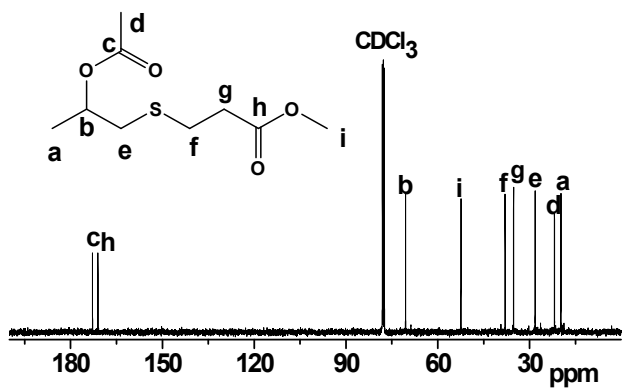

Figure S34.  $^{13}\text{C}$  NMR spectrum of **3b-1**.

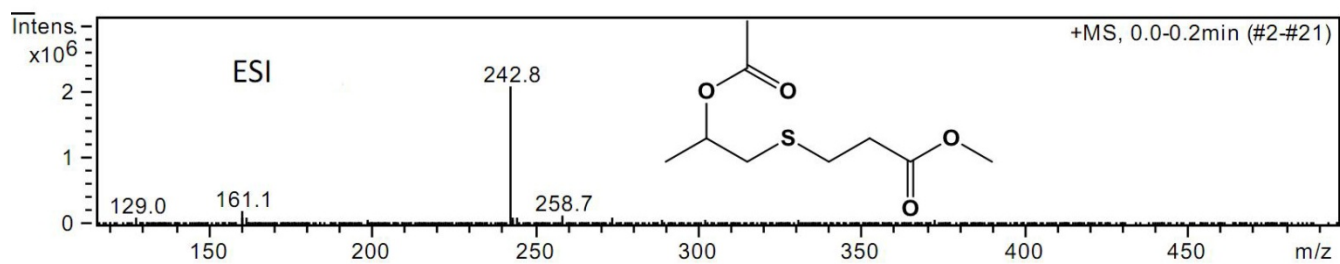

Figure S35. ESI-MS spectrum of **3b-1**.

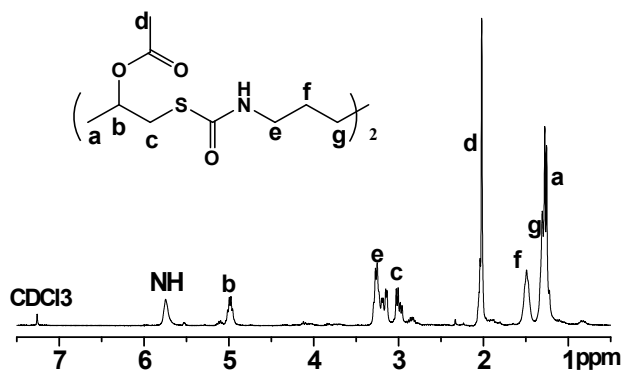

Figure S36.  $^1\text{H}$  NMR spectrum of **3b-2**.

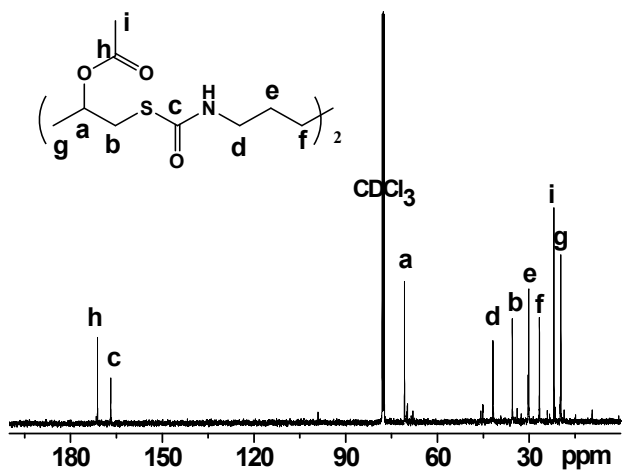

Figure S37.  $^{13}\text{C}$  NMR spectrum of **3b-2**.

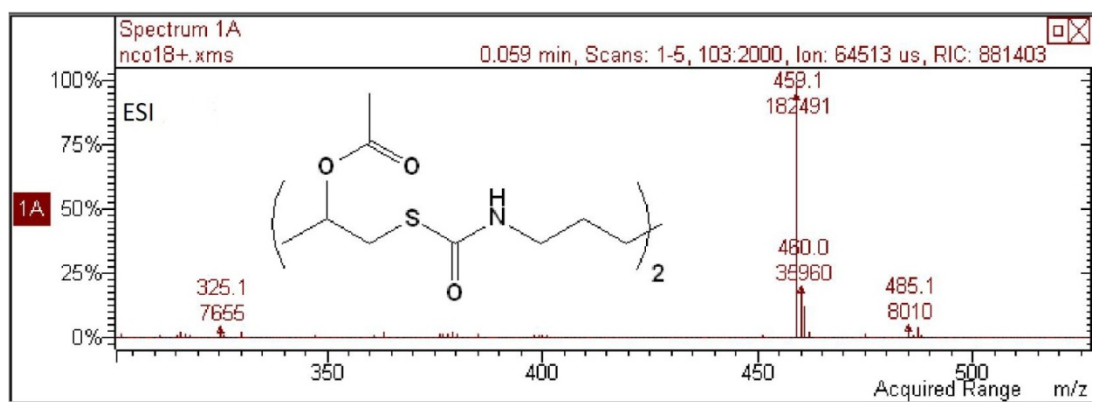

Figure S38. ESI-MS spectrum of **3b-2**.

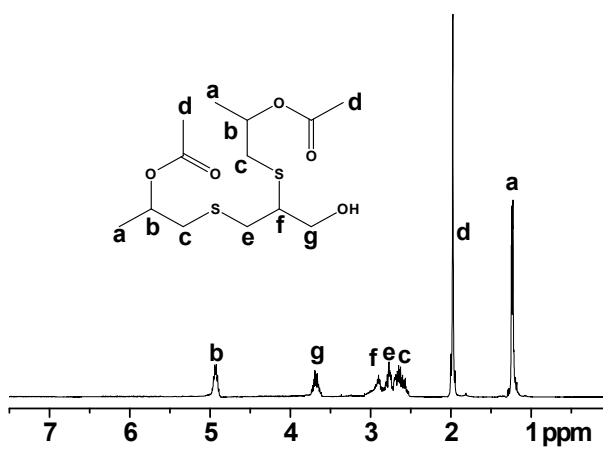

Figure S39.  $^1\text{H}$  NMR spectrum of **3b-3**.

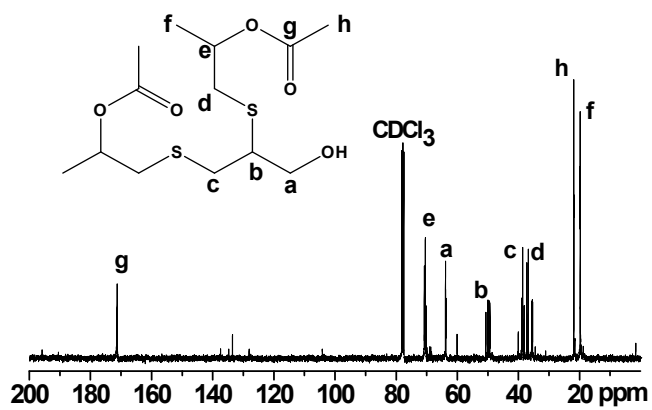

Figure S40. <sup>13</sup>C NMR spectrum of **3b-3**.

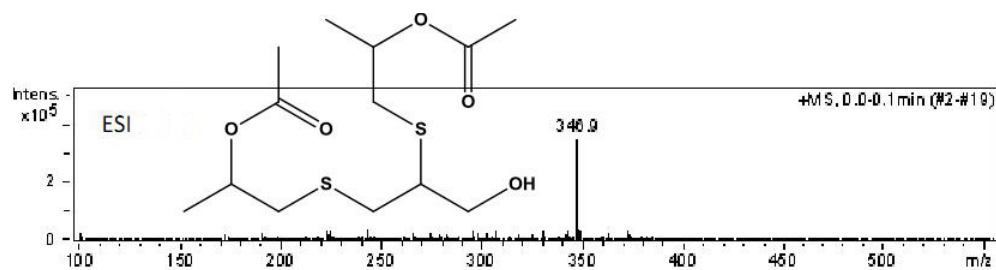

Figure S41. ESI-MS spectrum of **3b-3**.

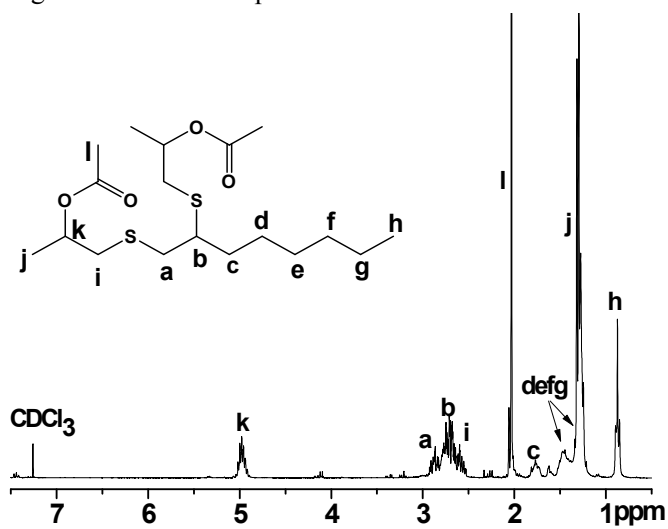

Figure S42. <sup>1</sup>H NMR spectrum of **3b-4**.

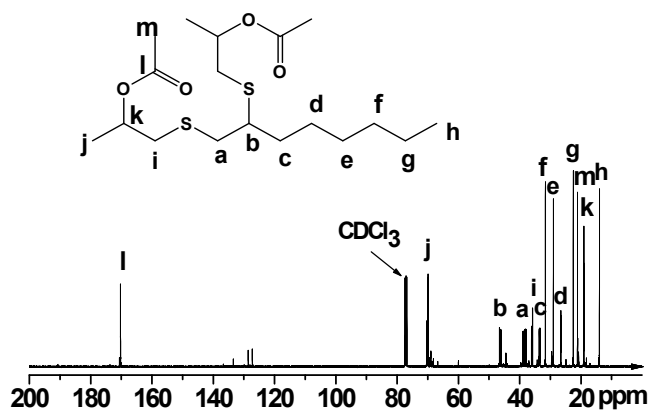

Figure S43.  $^{13}\text{C}$  NMR spectrum of **3b-4**.

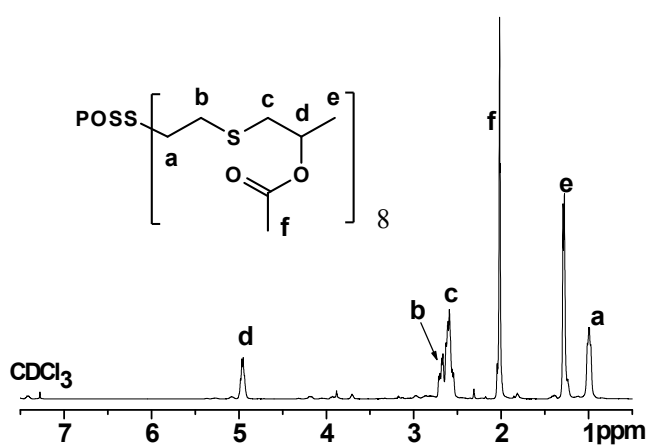

Figure S44.  $^1\text{H}$  NMR spectrum of **3b-5**.

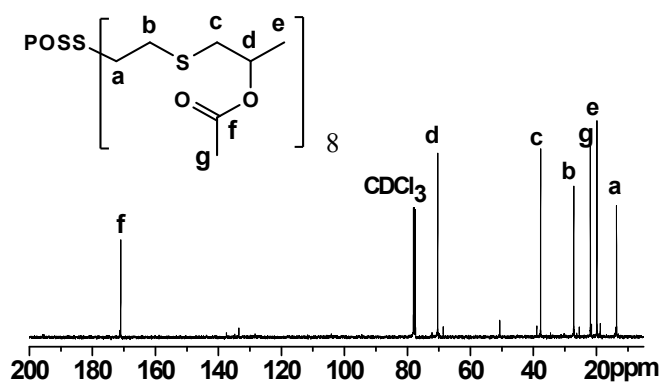

Figure S45.  $^{13}\text{C}$  NMR spectrum of **3b-5**.

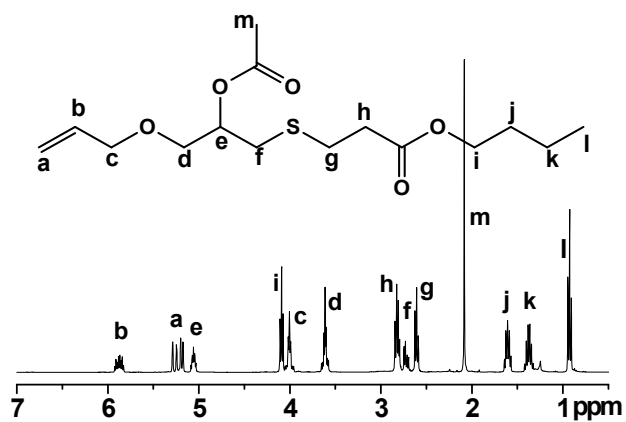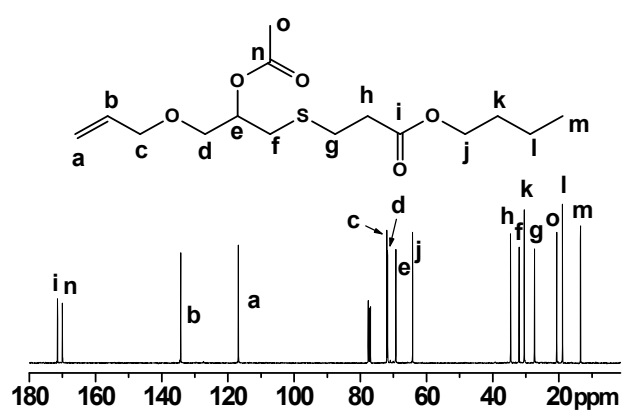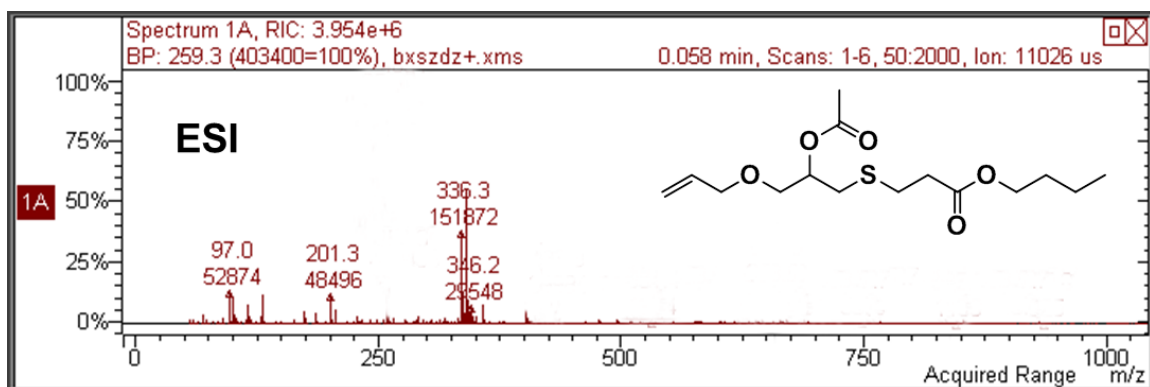

Figure S48. ESI-MS spectrum of **2a-1**.



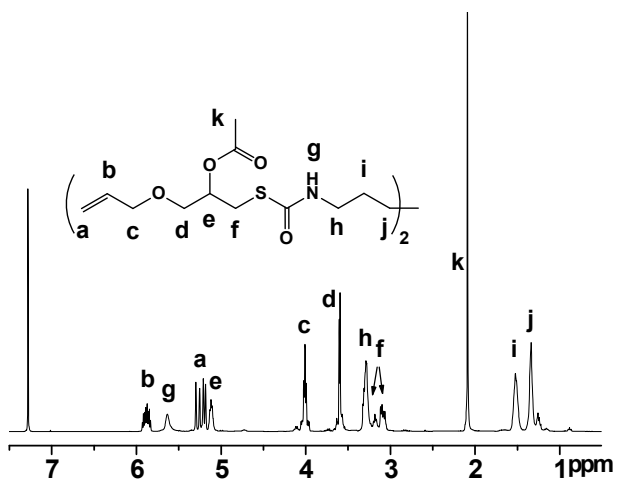

Figure S49. <sup>1</sup>H NMR spectrum of 2a-2.

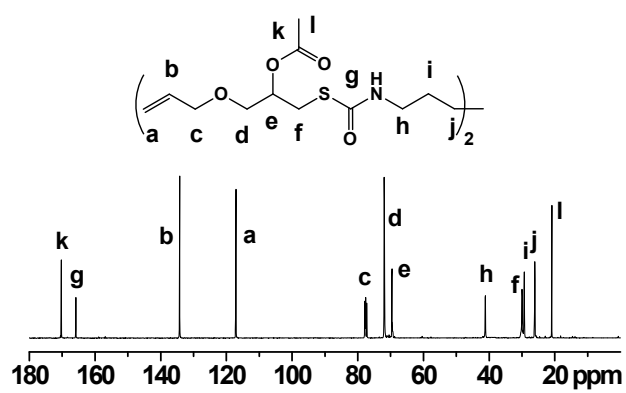

Figure S50. <sup>13</sup>C NMR spectrum of 2a-2.

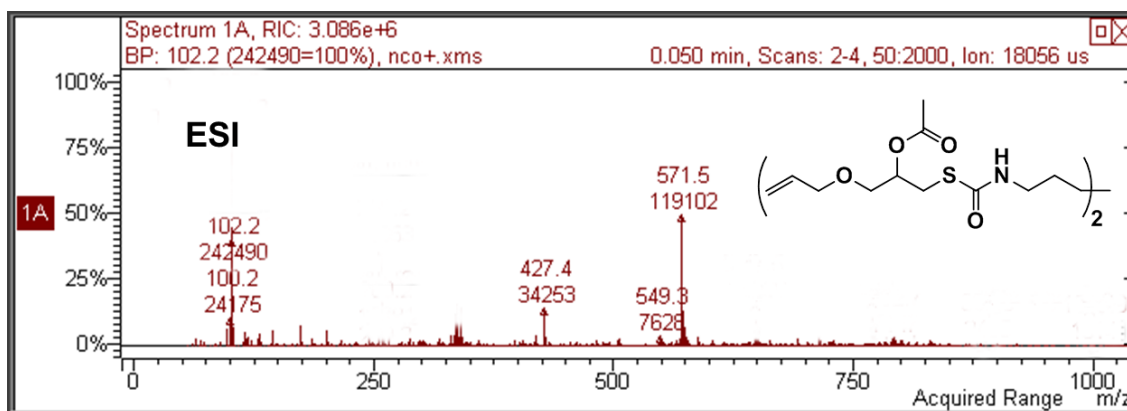

Figure S51. ESI-MS spectrum of 2a-2.

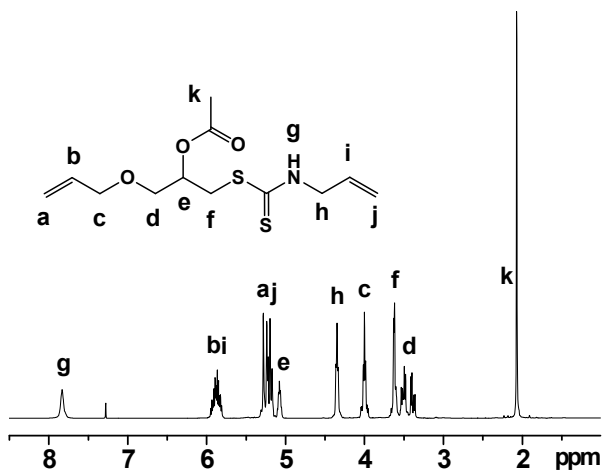

Figure S52. <sup>1</sup>H NMR spectrum of **2a-3**.

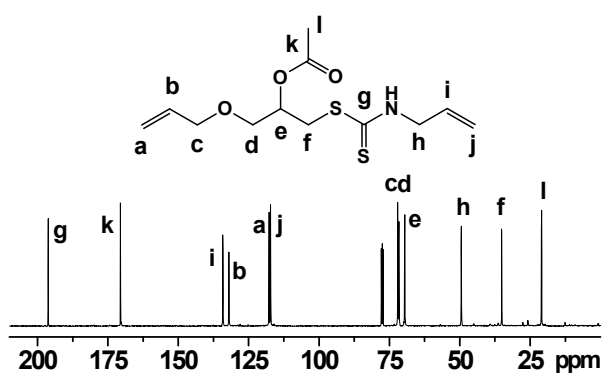

Figure S53. <sup>13</sup>C NMR spectrum of **2a-3**.

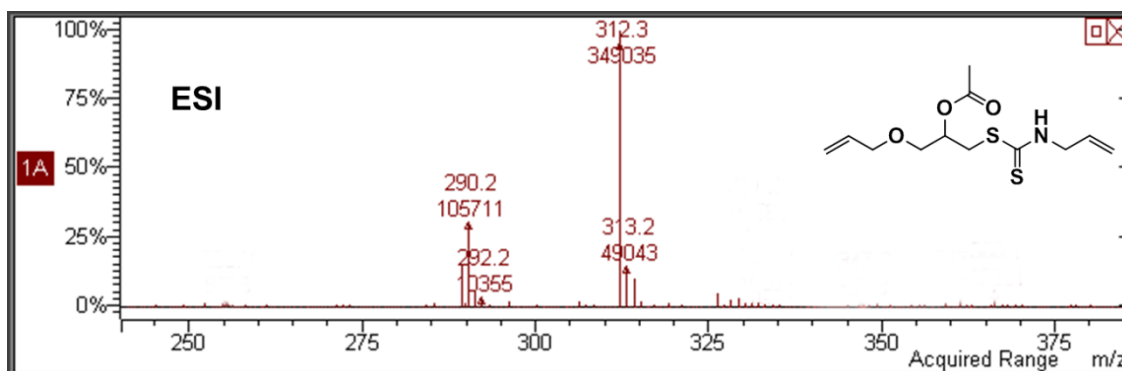

Figure S54. ESI-MS spectrum of **2a-3**.

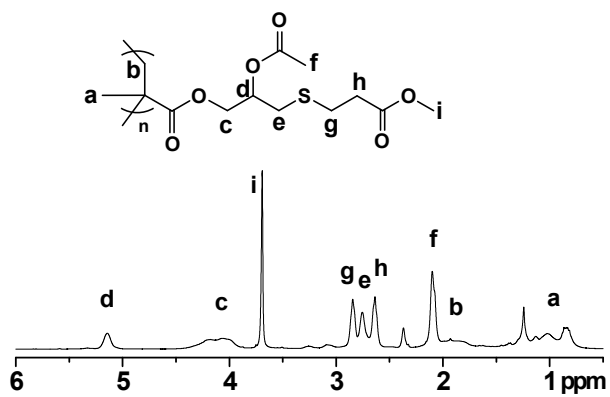

Figure S55.  $^1\text{H}$  NMR spectrum of **2d-1**.

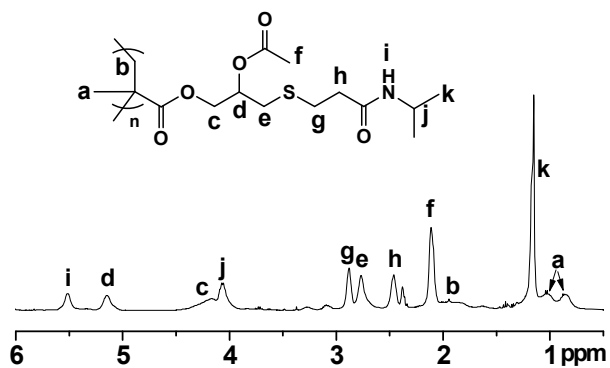

Figure S56.  $^1\text{H}$  NMR spectrum of **2d-2**.

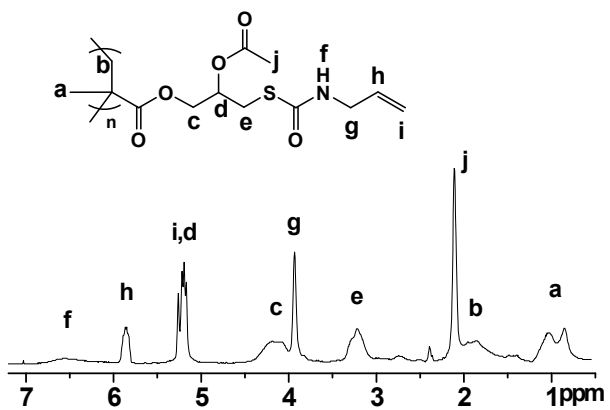

Figure S57.  $^1\text{H}$  NMR spectrum of **2d-3**.

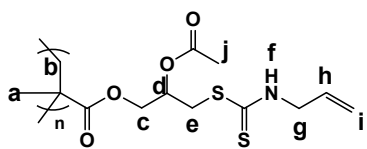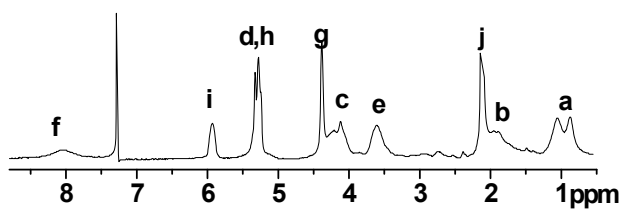

Figure S58. <sup>1</sup>H NMR spectrum of **2d-4**.
